# Supplementary material for: Self-organization, quality control, and preclinical studies of human iPSC-derived retinal sheets for tissue-transplantation therapy
Source: PubMed Central journal article supplement (PMC9918541; doi:10.1038/s42003-023-04543-5), 2023-02-10
Supplement: 42003_2023_4543_MOESM2_ESM.pdf [file 42003_2023_4543_MOESM2_ESM.pdf]

## **Description of Additional Supplementary Files**

File name: Supplementary Data

Description: The source data for graphs in the paper.
